## 1 Importations of COVID-19 into African countries and risk of onward spread

2 Haoyang Sun <sup>1,§</sup>, Borame L Dickens <sup>1</sup>, Alex R Cook <sup>1</sup>, Hannah E Clapham <sup>1</sup>

3

4 <sup>1</sup>Saw Swee Hock School of Public Health, National University of Singapore, 12 Science Drive 2, Singapore  
5 117549, Republic of Singapore

6

7 <sup>§</sup> Correspondence to:

8 Haoyang Sun. Saw Swee Hock School of Public Health, National University of Singapore, 12 Science Drive 2,  
9 Singapore 117549, Republic of Singapore. Email: [ephsunh@nus.edu.sg](mailto:ephsunh@nus.edu.sg).

## 10 Abstract

11

### 12 Background

13 The emergence of a novel coronavirus (SARS-CoV-2) in Wuhan, China, at the end of 2019 has caused  
14 widespread transmission around the world. As new epicentres in Europe and America have arisen, of  
15 particular concern is the increased number of imported coronavirus disease 2019 (COVID-19) cases  
16 in Africa, where the impact of the pandemic could be more severe. We aim to estimate the number  
17 of COVID-19 cases imported from 12 major epicentres in Europe and America to each African  
18 country, as well as the probability of reaching 10,000 infections in total by the end of March, April,  
19 and May following viral introduction.

20

### 21 Methods

22 We used the reported number of cases imported from the 12 major epicentres in Europe and  
23 America to Singapore, as well as flight data, to estimate the number of imported cases in each  
24 African country. Under the assumption that Singapore has detected all the imported cases, the  
25 estimates for Africa were thus conservative. We then propagated the uncertainty in the imported  
26 case count estimates to simulate the onward spread of the virus, until 10,000 infections are reached  
27 or the end of May, whichever is earlier. Specifically, 1,000 simulations were run separately under  
28 two scenarios, where the reproduction number under the stay-at-home order was assumed to be  
29 1.5 and 1.0 respectively.

30

### 31 Findings

32 We estimated Morocco, Algeria, South Africa, Egypt, Tunisia, and Nigeria as having the largest  
33 number of COVID-19 cases imported from the 12 major epicentres. Based on our 1,000 simulation  
34 runs, Morocco and Algeria's estimated probability of reaching 10,000 infections by end of March was  
35 close to 100% under both scenarios. In particular, we identified countries with less than 100 cases in  
36 total reported by end of April whilst the estimated probability of reaching 10,000 infections by then  
37 was higher than 50% even under the more optimistic scenario.

38

### 39 Conclusion

40 Our study highlights particular countries that are likely to reach (or have reached) 10,000 infections  
41 far earlier than the reported data suggest, calling for the prioritization of resources to mitigate the  
42 further spread of the epidemic.

43

### 44 Keywords

45 Coronavirus, COVID-19, SARS-CoV-2, Africa, Mathematical modelling

## 46 Background

47

48 In late December 2019, a novel coronavirus (SARS-CoV-2) was identified among patients presenting  
49 with viral pneumonia in Wuhan city, China<sup>1</sup>. Since then the number of coronavirus disease 2019  
50 (COVID-19) cases and deaths increased rapidly<sup>2,3</sup>, and the city was locked down by the Chinese  
51 government on 23<sup>rd</sup> January 2020. By late February, there had only been limited importations from  
52 and to places outside China<sup>4</sup>. However, new epicentres in Europe and America emerged shortly  
53 thereafter, causing a second wave of importations that further accelerated the spread of the  
54 pandemic<sup>4</sup>. Most countries have since then imposed travel restrictions to prevent further  
55 importation of COVID-19 cases<sup>5</sup>. By 30<sup>th</sup> April 2020, over three million cases and 200,000 deaths had  
56 been confirmed worldwide<sup>4</sup>.

57 A particular area of focus has been on countries in Africa, with worries about missed imported cases  
58 and what the impact will be of widespread transmission given the other heavy health burdens in  
59 these countries. The first confirmed case in Africa was reported in Egypt on 14<sup>th</sup> February 2020, and  
60 two weeks later, the virus was found in sub-Saharan Africa with a reported case in Nigeria<sup>4</sup>. By the  
61 end of April, over 37,000 cases had been reported in the whole of Africa, with substantial variation in  
62 the reported cumulative incidence across different countries<sup>4</sup>. This inter-country heterogeneity can  
63 be due to a wide range of factors, such as the number of imported infections, the capacity to  
64 conduct tests for COVID-19, surveillance efforts, as well as travel and movement restrictions which  
65 vary widely from country to country depending on the local context<sup>5</sup>. The reported data alone thus  
66 do not provide a clear depiction of the outbreak situation especially in countries with very limited  
67 surveillance capacities, and additional studies are needed to narrow the knowledge gap between the  
68 reported data and the real disease burdens.

69 Previous work has estimated the risk of importation from China at the early stage of the pandemic<sup>6</sup>,  
70 assessed each African country's capacity to respond to outbreaks<sup>6</sup>, systematically collated  
71 information on the importation events reported by the sub-Saharan countries<sup>7</sup>, and projected the  
72 spread of the epidemic seeded by the early cases represented in the World Health Organization  
73 Situation Reports<sup>8</sup>. It is still unclear how many infections may have been introduced to Africa from  
74 the new epicentres in Europe and America, although the reported case data do suggest that the size  
75 of this second wave of importations has been much larger than the first wave of importations from  
76 China<sup>7</sup>. In this study, we aim to estimate the number of COVID-19 cases imported from the major  
77 epicentres in Europe and America, and the magnitude of onward spread in each African country.  
78 This method is insensitive to the different testing and reporting systems that are in place in different  
79 countries.

## 80 [Methods](#)

81

### 82 [Data](#)

#### 83 *Case data*

84 We collated data on the daily number of imported cases in Singapore reported by 31<sup>st</sup> March from  
85 the following 12 epicentres: Austria, Belgium, France, Germany, Italy, Netherlands, Portugal, Spain,  
86 Switzerland, Turkey, United Kingdom, and United States, which accounted for over 90% of  
87 Singapore's reported number of imported cases from countries outside of Asia<sup>9</sup>. These data will be  
88 used later to estimate the number of imported cases in Africa. In addition, we obtained the total  
89 number of cases (imported and autochthonous combined) reported by each African country by end  
90 of March and April from the World Health Organization's situation reports<sup>4</sup>.

#### 91 *Government response data*

92 For each country, we collated the date on which each of the following policies came into force: (1)  
93 banning non-citizens and non-residents from entry (the start date could vary depending on the  
94 epicentre country from which a visitor arrived); (2) mandatory (self-) quarantine for travellers  
95 arriving from each of the 12 epicentre countries mentioned earlier; (3) Stay-at-home order for all  
96 non-essential workers (hereinafter referred to as "stay-at-home order"). We reviewed the following  
97 sources: (1) country-level internal and international restrictions collated by the International SOS<sup>5</sup>,  
98 (2) Oxford COVID-19 Government Response Tracker<sup>10</sup>, (3) international travel restrictions collated by  
99 the International Air Transport Association<sup>11</sup>, as well as (4) Wikipedia, where a separate page was  
100 available for each country containing information regarding the government response. For each  
101 Wikipedia page, we manually reviewed the online reports listed in the references to exclude data  
102 with unconfirmed or unreliable sources. If stay-at-home order came into force in different states of  
103 the same country at different times, only the earliest date was recorded.

#### 104 *Travel data*

105 We obtained the total number of air ticket bookings for each origin-destination route allowing for up  
106 to two connections during March 2017 from the Official Airline Guide. This will be used later to  
107 estimate the ratio of air passenger volumes between pairs of origin and destination countries, which  
108 we assumed to be relatively stable over time.

109

### 110 [Statistical analyses](#)

#### 111 *Estimating the number of imported cases*

112 For each African country  $r$ , we denote the daily number of air passengers that arrived from an  
113 epicentre country  $e$  by  $v_{e \rightarrow r}^{(t)}$  ( $t = t_e, t_e + 1, \dots, T_{e \rightarrow r}$ ), where  $t_e$  refers to the start date of the  
114 COVID-19 epidemic in the epicentre country  $e$ , and  $T_{e \rightarrow r}$  refers to the last day that non-citizens and  
115 non-residents travelling from country  $e$  were allowed to enter country  $r$ . Each day the probability  
116 that an air passenger travelling from country  $e$  to country  $r$  was an imported case is denoted by  $p_e^{(t)}$ ,  
117 which we assume to be dependent on both the origin country  $e$  and time  $t$ , but independent from  
118 the destination country  $r$ . Hence, the total number of COVID-19 cases imported from an epicentre  
119 country  $e$  to an African country  $r$  by the time the travel ban came into force (denoted by  $M_{e \rightarrow r}$   
120 below) can be approximated using a Poisson distribution (Refer to the supporting information for  
121 the derivation details):

$$122 \quad M_{e \rightarrow r} \sim Po \left( \sum_{t=t_e}^{T_{e \rightarrow r}} v_{e \rightarrow r}^{(t)} \cdot p_e^{(t)} \right).$$

123 We used the imported COVID-19 case data reported by Singapore as well as flight data to provide a  
124 conservative estimate for  $M_{e \rightarrow r}$ , under the assumption that Singapore, being one of the countries  
125 with the highest surveillance capacity<sup>12</sup>, has detected all the imported cases. Owing to the delay  
126 from infection to hospital admission, we considered all cases imported from country  $e$  to Singapore  
127 that were *reported* by date ( $T_{e \rightarrow r} + 9$ ) (hereinafter denoted as  $SG_{e,r}$ ) based on Linton et al.'s  
128 estimated mean incubation period and time from illness onset to hospital admission<sup>13</sup>. We assumed  
129 that the ratio between the daily number of air travellers from epicentre  $e$  to country  $r$  and to  
130 Singapore remained stable in the presence of the changes in flight pattern in response to the COVID-  
131 19 pandemic. This allows us to model  $M_{e \rightarrow r}$  (and  $SG_{e,r}$ ) as Poisson random variables with mean  
132 parameters proportional to the numbers of air passengers travelling from epicentre  $e$  to country  $r$   
133 (and to Singapore) using the March 2017 flight data (Refer to the supporting information for the  
134 derivation details):

$$135 \quad M_{e \rightarrow r} \sim Po \left( \beta_{e,r} \cdot \sum_{t \text{ in Mar 17}} v_{e \rightarrow r}^{(t)} \right),$$
$$136 \quad SG_{e,r} \sim Po \left( \beta_{e,r} \cdot \sum_{t \text{ in Mar 17}} v_{e \rightarrow SG}^{(t)} \right).$$

137 Here,  $\beta_{e,r}$  refers to the proportionality constant to be estimated using the reported value of  $SG_{e,r}$   
138 and flight data, and was assigned a uniform prior with support (0, 1). We performed Markov Chain  
139 Monte Carlo to sample from the posterior distribution of  $\beta_{e,r}$  using the JAGS software<sup>14</sup>, with 20,000  
140 iterations burn-in and 150,000 iterations thinned for a posterior sample of size 5,000. The posterior  
141 sample for all the model parameters was then used to estimate the uncertainty distribution of the  
142 total number of COVID-19 cases imported from the 12 major epicentres to each country.

143 In March 2020, a spike in the number of cases imported from United Kingdom and United States was  
144 observed in Singapore, which was partly due to the increase in the number of returning Singaporean  
145 students studying overseas<sup>15</sup>. This change in flight patterns, however, may not be applicable to all  
146 African countries. Therefore, to be even more conservative, we also derived the imported case count  
147 estimates excluding United Kingdom and United States from the 12 epicentre countries previously  
148 considered. The resulting estimates were subsequently used in the simulations of the onward spread  
149 of SARS-CoV-2 to get our estimates of case numbers over time.

150

### 151 *Simulating the onward transmission following importation*

152 We performed 1,000 simulations drawing from our estimated distribution of the number of  
153 imported cases to project the onward spread of SARS-CoV-2 in each country up to 31<sup>st</sup> May 2020 or  
154 the date when we estimate 10,000 infections was reached, whichever was earlier. The time of  
155 infection for the cases imported from country  $e$  to country  $r$  was simulated via resampling from the  
156 reporting dates of the  $SG_{e,r}$  cases, which was then shifted backwards by 9 days to account for the  
157 delay from infection to hospital admission based on Linton et al.'s estimates<sup>13</sup>. To account for the  
158 effect of quarantine measures on the onward transmission, we only included the estimated  
159 imported cases who had acquired the infection prior to the mandatory quarantine of travellers  
160 coming into force, so that the estimation of local SARS-CoV-2 spread is conservative. For each  
161 country and each day, we followed Cori et al. and expressed the total infectiousness of the infected  
162 individuals as the weighted sum of the past incident infections<sup>16</sup>, where the weight parameters were  
163 derived from the cumulative distribution function of COVID-19's serial interval based on Nishiura et  
164 al.'s estimate<sup>17</sup>. The number of secondary cases produced by each COVID-19 case, in the absence of  
165 stay-at-home order, was assumed to follow a negative binomial distribution with mean 2 and  
166 dispersion parameter 0.58<sup>8</sup>. Once the stay-at-home order came into force, we created two scenarios  
167 for the percentage reduction of the reproduction number: (1) 25% reduction, and (2) 50% reduction.  
168 To be conservative, we assumed that the stay-at-home order, once implemented, can be sustained  
169 up to the end date of our simulations. We ran the simulation algorithm following Churcher et al.<sup>18</sup>,  
170 and derived the estimated probability of reaching 10,000 infections by the end of March, April, and  
171 May respectively for each country. (Refer to the supporting information for the implementation  
172 details)

## 173 Results

174

175 We estimated Morocco, Algeria, South Africa, Egypt, Tunisia, and Nigeria as having the largest  
176 number of COVID-19 cases imported from the 12 new epicentres in Europe and America (Table 1  
177 and Figure 1). All of these countries had their lower bound estimate of the imported case count  
178 exceeding 100 (Table 1). By contrast, nine countries (e.g. Lesotho, Eswatini, and South Sudan) were  
179 found to have a very low risk of importation, with the upper bound estimate of the imported case  
180 count below 10 (Table 1). In a more conservative scenario where United Kingdom and United States  
181 were excluded from the list of epicentre countries, the estimated number of imported cases did not  
182 change drastically for most countries, albeit with some exceptions such as Kenya, whose estimate  
183 decreased from 97 (95% CI: 75–120) to 27 (95% CI: 16–41) (Table 1).

184 Based on our 1,000 simulations of the onward SARS-CoV-2 spread, both Morocco and Algeria's  
185 estimated probability of reaching 10,000 infections by end of March was close to 100% under both  
186 scenarios that we considered (Figures 2A, 2D), whilst the reported total number of cases in each  
187 country by end of March was ~500 (Figure 2G). Under the assumption that stay-at-home order  
188 reduces the reproduction number to 1.5, we found four African countries where the estimated  
189 probability of reaching 10,000 infections by end of March was higher than 50% (Figure 2A). This  
190 number quickly rose to 34 countries reaching this number of infections by the end of April, and 47  
191 countries by end May (Figures 2B, 2C). For the alternative scenario where the reproduction number  
192 is reduced to 1.0 by stay-at-home order, the numbers of African countries with a higher-than-50%  
193 estimated probability of reaching 10,000 infections by end of March, April, and May were 3, 23, and  
194 32 respectively (Figures 2D–2F). Notably, four countries (Angola, Gambia, Mozambique, and Sao  
195 Tome and Principe) were found to have reported less than 100 cases by end of April whilst the  
196 estimated probability of reaching 10,000 infections by then was higher than 50% even under the  
197 more optimistic scenario (Figures 2E, 2H), suggesting that a very substantial number of cases may  
198 have been undetected. The percentiles of the uncertainty distribution for the date by which 10,000  
199 infections are reached in each country under the two scenarios were shown in Table 2.

## 200 Discussion

201

202 Our study has estimated the size of the second wave of COVID-19 importations in each African  
203 country from the 12 major epicentres in Europe and America. This allows us to narrow the  
204 knowledge gap between the observed and actual number of importations, so that the unfolding of  
205 the epidemic seeded by the imported infections can be better projected especially in countries with  
206 very low testing capacities.

207 In the first wave of importations of infections from Wuhan, China, to other places outside China we  
208 estimated that most places at risk were in Asia, Europe and USA<sup>19</sup>. Though there were links between  
209 China and African countries, these were fewer than those between China and the rest of Asia,  
210 Europe and USA<sup>19</sup>. The shut down in China severely curtailed continuing importations out of China  
211 and so these importations rapidly stopped.

212 Lower initial importations into Africa compared to Asia and Europe certainly tallies with what has  
213 been seen. There have been very few reported cases in Africa in the first wave of importations, and  
214 no reports of onward transmission. There was much discussion at the time whether the lack of  
215 reported imported cases in Africa was because imported cases were not being picked up. This may  
216 be some of the story, but our analysis would suggest that this was not the whole story, and it was  
217 more that the early risk of importation into Africa was lower than other places<sup>19</sup>. However the  
218 results we present in this paper estimate that this risk has dramatically increased with the spread of  
219 the virus in Europe and the USA. This also tallies with what we have seen, as countries in Africa  
220 started to report their first imported cases from Europe and the USA<sup>4</sup>. As of April 30<sup>th</sup> 2020, South  
221 Africa had reported the highest number of cases at 5350<sup>4</sup>, and we estimated South Africa to have  
222 had one of the highest numbers of imported cases from the new epi-centres, although it was also  
223 rated highest at risk in Africa of importations from China in previous analysis<sup>6</sup>. Senegal is one of the  
224 countries for whom the risk has notably increased from the risk of importation from China as  
225 estimated in previous analyses<sup>6,19</sup>. We only considered importations from the major epicentres in  
226 Europe and America, and so the number of importations from all countries will be even higher.

227 Our study provides countries with information on the estimated timing of reaching 10,000  
228 infections, which can be used for planning. Under the assumption that stay-at-home order reduces  
229 the reproduction number from 2.0 to 1.5, our estimates suggest that a number of African countries  
230 will reach (or have reached) 10,000 infections even earlier than the predictions of Pearson et al.<sup>8</sup>  
231 This could be due to a number of imported infections being undetected and hence not reflected in  
232 the situation reports, as well as the delay from infection to reporting, both of which were accounted  
233 for in our study. Notably, we estimated two countries in North Africa, namely Algeria and Morocco,  
234 as having the highest probabilities of reaching 10,000 infections by the end of March, which may



235 have occurred even prior to the lockdown. Countries in Sub-Saharan Africa having the earliest  
236 estimated timings of reaching 10,000 infections include Angola, Côte d'Ivoire, Senegal, and South  
237 Africa. In countries where stringent social distancing measures have yet to be implemented at the  
238 time of writing (e.g. Tanzania), the unfolding of the epidemic was estimated to be substantially  
239 faster than previous estimates suggest<sup>8</sup>. On the other hand, we projected that countries such as  
240 Seychelles will reach 10,000 infections later than Pearson et al.'s forecasts<sup>8</sup> owing to the stay-at-  
241 home order. The epidemic was found to be further slowed down in many countries when we  
242 assumed the reproduction number to be reduced by 50% due to stay-at-home order.

243 Many countries in Africa have considerable experience in dealing with other infectious disease  
244 outbreaks, most notably Ebola, and will be able to call upon that experience for COVID-19. Countries  
245 hit in this third wave of transmission, including those in Africa have some advantage as there have  
246 been a variety of responses from around the world from which to assess what to do or not to do.  
247 However there will need to be consideration of how effective measures can be adapted to different  
248 settings<sup>20</sup>. Issues such as high HIV prevalence in some countries, and a younger demographic may  
249 both affect the cases and deaths observed in different ways. This relationship however is yet to be  
250 determined and there will need to be rapid research in countries in Africa to determine what the risk  
251 of disease is in different populations and how best to respond in light of many other competing  
252 health priorities.

253 Many countries in Africa are on high alert for incoming cases from Europe and USA, taking measures  
254 such as quarantine of arrivals or shutting down travel from affected countries. This is a sensible  
255 response given the vast amount of transmission on-going in these places. However as travel is either  
256 maintained or reopened between countries closer by, risk of importations from other countries  
257 should continue to be considered. Close attention should therefore be paid to where will be the next  
258 epicentre, perhaps within Africa, and how this could translate into imported cases for each country,  
259 particularly for those countries that we estimate to have experienced lower numbers of imported  
260 cases previously and therefore lower onward transmission.

261 Not accounted for in our study currently is the impact of less stringent interventions on the local  
262 SARS-CoV-2 spread, such as the effect of prohibiting large public gatherings, closure of social venues  
263 and schools, and restrictions on inter-district travels. It is still unclear as to whether and to what  
264 extent these interventions were effective in their local context, and hence in our simulations we only  
265 considered stay-at-home order for all non-essential workers as an effective intervention to reduce  
266 local transmission. Future modelling work considering the impact of different interventions in  
267 different places will be vital for determining how each country can continue to respond.

268 In addition, we have made simplifying assumptions about the change in travel patterns in response  
269 to the pandemic in each African country relative to that in Singapore, due to the unavailability of

270 2020 flight data. Despite these limitations, most of our model assumptions throughout the analyses  
271 have been fairly conservative to avoid inflating the projections of the SARS-CoV-2 spread. For  
272 example, the reported number of imported cases in Singapore was assumed to be complete, and the  
273 risk of returning citizens carrying SARS-CoV-2 after travel restrictions came into force in each African  
274 country was also not included. Simulations of the onward spread of the virus were based on the  
275 estimated number of imported infections from the selected 10 epicentre countries, and stay-at-  
276 home order was assumed to be effective (reproduction numbers being 1.5 and 1.0 in the two  
277 scenarios we considered) and sustainable. In light of these conservative assumptions, any countries  
278 found to have a high probability of reaching 10,000 infections by end March or April—especially  
279 those with very limited cases detected—need urgent actions.

280

## 281 [Conclusions](#)

282

283 In conclusion, our study provides model estimates of the number of COVID-19 cases imported from  
284 major epicentres in Europe and America to each country in Africa, as well as simulation results of the  
285 onward epidemic spread. Our results highlight particular countries that are likely to reach (or have  
286 reached) 10,000 infections far earlier than the reported data suggest, calling for the prioritization of  
287 resources to mitigate the further spread of the epidemic.

288

## 289 [List of abbreviations](#)

290

291 COVID-19: Coronavirus disease 2019

292 SARS-CoV-2: Severe acute respiratory syndrome coronavirus 2

293 Declarations

294

295 Ethics approval and consent to participate

296 Not applicable.

297

298 Consent for publication

299 Not applicable.

300

301 Availability of data and materials

302 Data on the reported number of imported cases in Singapore are available from

303 <https://www.moh.gov.sg/covid-19/past-updates>

304 Flight data used in this study were purchased from the Official Airline Guide.

305 Government response data used in this study have been included within the Additional file 1.

306 Supporting information has been included within the Additional file 2.

307

308 Competing interests

309 The authors declare that they have no competing interests.

310

311 Funding

312 This research is supported by the Singapore Ministry of Health's National Medical Research Council

313 under the Centre Grant Programme - Singapore Population Health Improvement Centre

314 (NMRC/CG/C026/2017\_NUHS) and grant COVID19RF-004. The funders had no role in the design of

315 the study, the collection, analysis and interpretation of data, or in writing the manuscript.

316

317 Authors' contributions

318 HS and HC designed the study and HS carried out the analysis. All authors contributed to the results

319 interpretation, writing of the manuscript and approved it before submission.

320

321 Acknowledgements

322 Not applicable.

323

324 References

- 325 1. Lu R, Zhao X, Li J, Niu P, Yang B, Wu H, et al. Genomic characterisation and epidemiology of  
326 2019 novel coronavirus: implications for virus origins and receptor binding. *Lancet* (London,  
327 England). 2020 Jan;0(0).
- 328 2. Li Q, Guan X, Wu P, Wang X, Zhou L, Tong Y, et al. Early Transmission Dynamics in Wuhan,  
329 China, of Novel Coronavirus–Infected Pneumonia. *N Engl J Med*. 2020 Jan;NEJMoa2001316.
- 330 3. Huang C, Wang Y, Li X, Ren L, Zhao J, Hu Y, et al. Clinical features of patients infected with  
331 2019 novel coronavirus in Wuhan, China. *Lancet* (London, England). 2020 Jan;0(0).
- 332 4. World Health Organization. Coronavirus disease (COVID-2019) situation reports [Internet].  
333 2020 [cited 2020 May 1]. Available from: [https://www.who.int/emergencies/diseases/novel-](https://www.who.int/emergencies/diseases/novel-coronavirus-2019/situation-reports)  
334 [coronavirus-2019/situation-reports](https://www.who.int/emergencies/diseases/novel-coronavirus-2019/situation-reports)
- 335 5. International SOS. TRAVEL RESTRICTIONS, FLIGHT OPERATIONS AND SCREENING [Internet].  
336 2020 [cited 2020 Apr 27]. Available from: [https://pandemic.internationalsos.com/2019-](https://pandemic.internationalsos.com/2019-ncov/ncov-travel-restrictions-flight-operations-and-screening)  
337 [ncov/ncov-travel-restrictions-flight-operations-and-screening](https://pandemic.internationalsos.com/2019-ncov/ncov-travel-restrictions-flight-operations-and-screening)
- 338 6. Gilbert M, Pullano G, Pinotti F, Valdano E, Poletto C, Boëlle P-Y, et al. Preparedness and  
339 vulnerability of African countries against importations of COVID-19: a modelling study. *Lancet*  
340 (London, England). 2020 Mar;395(10227):871–7.
- 341 7. Skrip LA, Selvaraj P, Hagedorn B, Ouédraogo AL, Noori N, Mistry D, et al. Seeding COVID-19  
342 across sub-Saharan Africa: an analysis of reported importation events across 40 countries.  
343 *medRxiv* [Internet]. 2020 Jan 1;2020.04.01.20050203. Available from:  
344 <http://medrxiv.org/content/early/2020/04/06/2020.04.01.20050203.abstract>
- 345 8. Pearson CAB, Schalkwyk C Van, Foss A, O’Reilly K, SACEMA’s Modelling and Analysis Response  
346 Team, CMMID COVID-19 working group, et al. Projection of early spread of COVID-19 in  
347 Africa as of 25 March 2020 [Internet]. 2020. Available from:  
348 [https://cmmid.github.io/topics/covid19/current-patterns-](https://cmmid.github.io/topics/covid19/current-patterns-transmission/reports/COVID10k_Africa.pdf)  
349 [transmission/reports/COVID10k\\_Africa.pdf](https://cmmid.github.io/topics/covid19/current-patterns-transmission/reports/COVID10k_Africa.pdf)
- 350 9. Ministry of Health Singapore. UPDATES ON COVID-19 (CORONAVIRUS DISEASE 2019) LOCAL  
351 SITUATION [Internet]. 2020 [cited 2020 Apr 1]. Available from:  
352 <https://www.moh.gov.sg/covid-19>
- 353 10. Hale T, Webster S, Petherick A, Phillips T, Kira B. Oxford COVID-19 Government Response  
354 Tracker [Internet]. 2020. Available from: <https://covidtracker.bsg.ox.ac.uk/>
- 355 11. IATA. CORONAVIRUS OUTBREAK - UPDATE [Internet]. 2020 [cited 2020 Apr 11]. Available  
356 from: [https://www.iatatravelcentre.com/international-travel-document-](https://www.iatatravelcentre.com/international-travel-document-news/1580226297.htm)  
357 [news/1580226297.htm](https://www.iatatravelcentre.com/international-travel-document-news/1580226297.htm)
- 358 12. Niehus R, Salazar PM De, Taylor A, Lipsitch M. Quantifying bias of COVID-19 prevalence and  
359 severity estimates in Wuhan, China that depend on reported cases in international travelers.  
360 *medRxiv*. 2020;
- 361 13. Linton NM, Kobayashi T, Yang Y, Hayashi K, Akhmetzhanov AR, Jung S, et al. Incubation Period  
362 and Other Epidemiological Characteristics of 2019 Novel Coronavirus Infections with Right  
363 Truncation: A Statistical Analysis of Publicly Available Case Data. *J Clin Med* [Internet]. 2020  
364 Feb 17;9(2):538. Available from: <https://www.mdpi.com/2077-0383/9/2/538>
- 365 14. Plummer M. JAGS : A program for analysis of Bayesian graphical models using Gibbs  
366 sampling. In 2003. Available from: <http://www.ci.tuwien.ac.at/Conferences/DSC-2003/>

- 367 15. Elangovan N, Lim J. Covid-19: S'porean students abroad heading home after government  
368 advisory but a few plan to stay put [Internet]. TODAY. 2020 [cited 2020 Apr 11]. Available  
369 from: [https://www.todayonline.com/singapore/covid-19-sporean-students-overseas-](https://www.todayonline.com/singapore/covid-19-sporean-students-overseas-prepare-head-home-after-government-advisory-few-vow)  
370 [prepare-head-home-after-government-advisory-few-vow](https://www.todayonline.com/singapore/covid-19-sporean-students-overseas-prepare-head-home-after-government-advisory-few-vow)
- 371 16. Cori A, Ferguson NM, Fraser C, Cauchemez S. A New Framework and Software to Estimate  
372 Time-Varying Reproduction Numbers During Epidemics. *Am J Epidemiol* [Internet]. 2013 Nov  
373 1;178(9):1505–12. Available from: [https://academic.oup.com/aje/article-](https://academic.oup.com/aje/article-lookup/doi/10.1093/aje/kwt133)  
374 [lookup/doi/10.1093/aje/kwt133](https://academic.oup.com/aje/article-lookup/doi/10.1093/aje/kwt133)
- 375 17. Nishiura H, Linton NM, Akhmetzhanov AR. Serial interval of novel coronavirus (COVID-19)  
376 infections. *Int J Infect Dis* [Internet]. 2020 Apr;93:284–6. Available from:  
377 <https://linkinghub.elsevier.com/retrieve/pii/S1201971220301193>
- 378 18. Churcher TS, Cohen JM, Novotny J, Ntshalintshali N, Kunene S, Cauchemez S. Measuring the  
379 path toward malaria elimination. *Science (80- )* [Internet]. 2014 Jun 13;344(6189):1230–2.  
380 Available from: <http://www.sciencemag.org/cgi/doi/10.1126/science.1251449>
- 381 19. Sun H, Dickens BL, Chen M, Cook AR, Clapham HE. Estimating number of global importations  
382 of COVID-19 from Wuhan, risk of transmission outside mainland China and COVID-19  
383 introduction index between countries outside mainland China. *medRxiv*. 2020  
384 Feb;2020.02.17.20024075.
- 385 20. Mehtar S, Preiser W, Lakhe NA, Bouso A, TamFum J-JM, Kallay O, et al. Limiting the spread of  
386 COVID-19 in Africa: one size mitigation strategies do not fit all countries. *Lancet Glob Heal*  
387 [Internet]. 2020 Apr; Available from:  
388 <https://linkinghub.elsevier.com/retrieve/pii/S2214109X20302126>
- 389

390 **Figure 1: Posterior median estimates of the number of imported COVID-19 infections.**

391 Results include imported infections from (A) all the 12 major epicentres in Europe and America, and  
392 (B) 10 epicentres only, after excluding United Kingdom and United States to create a more  
393 conservative estimate (refer to Methods for more details).

394

395 **Figure 2: Estimated probability of reaching 10,000 infections as well as the reported total number**  
396 **of cases by each country.**

397 Stay-at-home order was assumed to reduce the reproduction number to (A–C) 1.5 and (D–F) 1.0  
398 respectively. Reproduction number in the absence of stay-at-home order in each country was  
399 assumed to be 2. Reported total number of cases (G–H) were extracted from the World Health  
400 Organization’s situation reports.

| Country                  | Estimated imported case count from 12 epicentres | Estimated imported case count from 10 epicentres |
|--------------------------|--------------------------------------------------|--------------------------------------------------|
| Algeria                  | 671 (489–891)                                    | 630 (449–851)                                    |
| Angola                   | 110 (48–227)                                     | 95 (34–212)                                      |
| Benin                    | 12 (6–20)                                        | 10 (4–18)                                        |
| Botswana                 | 4 (1–9)                                          | 1 (0–4)                                          |
| Burkina Faso             | 15 (7–24)                                        | 13 (6–22)                                        |
| Burundi                  | 2 (0–7)                                          | 2 (0–5)                                          |
| Cabo Verde               | 116 (83–173)                                     | 55 (27–109)                                      |
| Cameroon                 | 38 (25–54)                                       | 29 (18–44)                                       |
| Central African Republic | 3 (0–7)                                          | 3 (0–7)                                          |
| Chad                     | 3 (0–8)                                          | 2 (0–6)                                          |
| Comoros                  | 2 (0–6)                                          | 2 (0–6)                                          |
| Congo                    | 18 (9–29)                                        | 14 (6–25)                                        |
| Congo DRC                | 22 (12–36)                                       | 17 (8–30)                                        |
| Côte d'Ivoire            | 47 (29–68)                                       | 39 (22–60)                                       |
| Djibouti                 | 7 (2–13)                                         | 5 (1–10)                                         |
| Egypt                    | 287 (233–353)                                    | 173 (125–231)                                    |
| Equatorial Guinea        | 12 (5–22)                                        | 9 (3–18)                                         |
| Eritrea                  | 3 (0–8)                                          | 1 (0–4)                                          |
| Eswatini                 | 0 (0–2)                                          | 0 (0–1)                                          |
| Ethiopia                 | 45 (32–61)                                       | 20 (10–31)                                       |
| Gabon                    | 16 (7–26)                                        | 14 (6–24)                                        |
| Gambia                   | 24 (14–35)                                       | 7 (2–14)                                         |
| Ghana                    | 77 (58–98)                                       | 16 (8–26)                                        |
| Guinea                   | 16 (8–25)                                        | 13 (6–22)                                        |
| Guinea-Bissau            | 10 (3–24)                                        | 10 (2–24)                                        |
| Kenya                    | 97 (75–120)                                      | 27 (16–41)                                       |
| Lesotho                  | 0 (0–2)                                          | 0 (0–1)                                          |
| Liberia                  | 6 (2–12)                                         | 2 (0–6)                                          |
| Libya                    | 14 (4–36)                                        | 13 (3–34)                                        |
| Madagascar               | 21 (11–34)                                       | 19 (10–31)                                       |
| Malawi                   | 7 (2–13)                                         | 1 (0–4)                                          |
| Mali                     | 23 (13–36)                                       | 21 (11–33)                                       |
| Mauritania               | 6 (2–12)                                         | 5 (1–11)                                         |
| Mauritius                | 122 (94–154)                                     | 66 (44–93)                                       |
| Mayotte                  | 6 (2–13)                                         | 6 (2–13)                                         |
| Morocco                  | 742 (575–959)                                    | 555 (391–765)                                    |
| Mozambique               | 24 (11–46)                                       | 19 (7–40)                                        |
| Namibia                  | 10 (4–17)                                        | 6 (2–12)                                         |
| Niger                    | 8 (3–14)                                         | 6 (2–13)                                         |
| Nigeria                  | 160 (130–192)                                    | 28 (17–41)                                       |
| Rwanda                   | 12 (6–20)                                        | 5 (1–11)                                         |
| Réunion                  | 75 (46–114)                                      | 74 (45–113)                                      |
| Sao Tome and Principe    | 8 (1–21)                                         | 8 (1–20)                                         |
| Senegal                  | 96 (69–129)                                      | 83 (57–115)                                      |
| Seychelles               | 35 (23–49)                                       | 22 (12–34)                                       |
| Sierra Leone             | 14 (7–22)                                        | 2 (0–6)                                          |
| Somalia                  | 9 (4–16)                                         | 2 (0–6)                                          |
| South Africa             | 342 (287–404)                                    | 119 (89–159)                                     |
| South Sudan              | 2 (0–6)                                          | 1 (0–3)                                          |
| Sudan                    | 23 (13–37)                                       | 12 (5–24)                                        |
| Tanzania                 | 58 (42–75)                                       | 23 (13–36)                                       |
| Togo                     | 11 (5–19)                                        | 8 (3–15)                                         |
| Tunisia                  | 214 (157–285)                                    | 195 (137–264)                                    |
| Uganda                   | 16 (8–25)                                        | 7 (2–13)                                         |
| Zambia                   | 15 (8–24)                                        | 3 (0–7)                                          |
| Zimbabwe                 | 30 (20–42)                                       | 3 (0–7)                                          |

Table 1: Estimated number of COVID-19 cases (with 95% credible interval) imported from the 12 new epicentres in Europe and America (second column), and after excluding United Kingdom and United States from the list of epicentre countries (third column) to create a more conservative estimate (refer to Methods for more details).

| Country                  | Stay-at-home order reduces reproduction number to 1.5 |               |               |               |                 | Stay-at-home order reduces reproduction number to 1.0 |               |               |               |                 |
|--------------------------|-------------------------------------------------------|---------------|---------------|---------------|-----------------|-------------------------------------------------------|---------------|---------------|---------------|-----------------|
|                          | 2.5 Percentile                                        | 25 Percentile | 50 Percentile | 75 Percentile | 97.5 Percentile | 2.5 Percentile                                        | 25 Percentile | 50 Percentile | 75 Percentile | 97.5 Percentile |
| Algeria                  | 03-18                                                 | 03-20         | 03-20         | 03-21         | 03-24           | 03-18                                                 | 03-20         | 03-20         | 03-21         | 03-24           |
| Angola                   | 03-24                                                 | 03-30         | 04-02         | 04-07         | 04-18           | 03-25                                                 | 03-30         | 04-08         | 04-25         | >05-31          |
| Benin                    | 04-05                                                 | 04-19         | 04-26         | 05-08         | >05-31          | 04-14                                                 | >05-31        | >05-31        | >05-31        | >05-31          |
| Botswana                 | 04-22                                                 | 05-22         | >05-31        | >05-31        | >05-31          | >05-31                                                | >05-31        | >05-31        | >05-31        | >05-31          |
| Burkina Faso             | 04-04                                                 | 04-11         | 04-14         | 04-19         | 05-04           | 04-04                                                 | 04-11         | 04-14         | 04-19         | 05-04           |
| Burundi                  | 04-14                                                 | 04-26         | >05-31        | >05-31        | >05-31          | 04-14                                                 | 04-26         | >05-31        | >05-31        | >05-31          |
| Cabo Verde               | 03-27                                                 | 04-03         | 04-07         | 04-12         | 04-24           | 03-27                                                 | 04-10         | 04-23         | 05-19         | >05-31          |
| Cameroon                 | 03-31                                                 | 04-06         | 04-09         | 04-12         | 04-18           | 03-31                                                 | 04-06         | 04-09         | 04-12         | 04-18           |
| Central African Republic | 04-08                                                 | 04-20         | 05-01         | >05-31        | >05-31          | 04-08                                                 | 04-20         | 05-01         | >05-31        | >05-31          |
| Chad                     | 04-08                                                 | 04-21         | 05-03         | >05-31        | >05-31          | 04-08                                                 | 04-21         | 05-03         | >05-31        | >05-31          |
| Comoros                  | 04-10                                                 | 04-22         | 05-17         | >05-31        | >05-31          | 04-10                                                 | 04-22         | 05-17         | >05-31        | >05-31          |
| Congo                    | 04-04                                                 | 04-14         | 04-20         | 04-29         | 05-26           | 04-08                                                 | 05-11         | >05-31        | >05-31        | >05-31          |
| Congo DRC                | 04-08                                                 | 04-19         | 04-25         | 05-05         | >05-31          | 05-02                                                 | >05-31        | >05-31        | >05-31        | >05-31          |
| Côte d'Ivoire            | 03-30                                                 | 04-03         | 04-05         | 04-08         | 04-15           | 03-30                                                 | 04-03         | 04-05         | 04-08         | 04-15           |
| Djibouti                 | 04-18                                                 | 05-06         | 05-19         | >05-31        | >05-31          | >05-31                                                | >05-31        | >05-31        | >05-31        | >05-31          |
| Egypt                    | 03-25                                                 | 03-28         | 03-29         | 03-31         | 04-03           | 03-25                                                 | 03-28         | 03-29         | 03-31         | 04-03           |
| Equatorial Guinea        | 04-08                                                 | 04-19         | 04-26         | 05-06         | >05-31          | 04-12                                                 | 05-23         | >05-31        | >05-31        | >05-31          |
| Eritrea                  | 04-17                                                 | 05-21         | >05-31        | >05-31        | >05-31          | 05-06                                                 | >05-31        | >05-31        | >05-31        | >05-31          |
| Eswatini                 | 05-20                                                 | >05-31        | >05-31        | >05-31        | >05-31          | >05-31                                                | >05-31        | >05-31        | >05-31        | >05-31          |
| Ethiopia                 | 04-05                                                 | 04-12         | 04-17         | 04-23         | 05-11           | 04-04                                                 | 04-14         | 04-28         | 05-28         | >05-31          |
| Gabon                    | 04-03                                                 | 04-10         | 04-15         | 04-23         | 05-18           | 04-03                                                 | 04-11         | 04-23         | 05-24         | >05-31          |
| Gambia                   | 04-07                                                 | 04-15         | 04-20         | 04-27         | >05-31          | 04-07                                                 | 04-15         | 04-20         | 04-27         | >05-31          |
| Ghana                    | 04-05                                                 | 04-15         | 04-21         | 04-29         | 05-23           | 04-10                                                 | 05-27         | >05-31        | >05-31        | >05-31          |
| Guinea                   | 04-05                                                 | 04-11         | 04-15         | 04-20         | 05-03           | 04-05                                                 | 04-11         | 04-15         | 04-20         | 05-03           |
| Guinea-Bissau            | 04-05                                                 | 04-21         | 05-03         | 05-17         | >05-31          | 04-14                                                 | >05-31        | >05-31        | >05-31        | >05-31          |
| Kenya                    | 04-01                                                 | 04-06         | 04-11         | 04-16         | 04-29           | 04-01                                                 | 04-08         | 04-15         | 04-27         | >05-31          |
| Lesotho                  | 05-27                                                 | >05-31        | >05-31        | >05-31        | >05-31          | >05-31                                                | >05-31        | >05-31        | >05-31        | >05-31          |
| Liberia                  | 04-15                                                 | 05-05         | >05-31        | >05-31        | >05-31          | 04-18                                                 | >05-31        | >05-31        | >05-31        | >05-31          |
| Libya                    | 04-10                                                 | 04-20         | 04-26         | 05-06         | >05-31          | 05-04                                                 | >05-31        | >05-31        | >05-31        | >05-31          |
| Madagascar               | 04-10                                                 | 04-20         | 04-27         | 05-05         | 05-28           | >05-31                                                | >05-31        | >05-31        | >05-31        | >05-31          |
| Malawi                   | 04-15                                                 | 05-14         | >05-31        | >05-31        | >05-31          | 04-15                                                 | >05-31        | >05-31        | >05-31        | >05-31          |
| Mali                     | 04-02                                                 | 04-08         | 04-11         | 04-15         | 04-25           | 04-02                                                 | 04-08         | 04-11         | 04-15         | 04-25           |
| Mauritania               | 04-12                                                 | 04-27         | 05-09         | 05-31         | >05-31          | 05-11                                                 | >05-31        | >05-31        | >05-31        | >05-31          |
| Mauritius                | 03-30                                                 | 04-05         | 04-09         | 04-12         | 04-20           | 04-06                                                 | 04-28         | 05-17         | >05-31        | >05-31          |
| Mayotte                  | 04-13                                                 | 04-30         | 05-10         | 05-27         | >05-31          | >05-31                                                | >05-31        | >05-31        | >05-31        | >05-31          |
| Morocco                  | 03-17                                                 | 03-19         | 03-20         | 03-21         | 03-23           | 03-17                                                 | 03-19         | 03-20         | 03-21         | 03-26           |
| Mozambique               | 03-31                                                 | 04-09         | 04-14         | 04-21         | >05-31          | 03-31                                                 | 04-09         | 04-14         | 04-21         | >05-31          |
| Namibia                  | 04-06                                                 | 04-14         | 04-22         | 05-04         | >05-31          | 04-05                                                 | 04-14         | 05-01         | >05-31        | >05-31          |
| Niger                    | 04-08                                                 | 04-17         | 04-22         | 05-01         | >05-31          | 04-08                                                 | 04-17         | 04-22         | 05-01         | >05-31          |



(Continued)

| Country               | Stay-at-home order reduces reproduction number to 1.5 |               |               |               |                 | Stay-at-home order reduces reproduction number to 1.0 |               |               |               |                 |
|-----------------------|-------------------------------------------------------|---------------|---------------|---------------|-----------------|-------------------------------------------------------|---------------|---------------|---------------|-----------------|
|                       | 2.5 Percentile                                        | 25 Percentile | 50 Percentile | 75 Percentile | 97.5 Percentile | 2.5 Percentile                                        | 25 Percentile | 50 Percentile | 75 Percentile | 97.5 Percentile |
| Nigeria               | 04-05                                                 | 04-14         | 04-19         | 04-25         | 05-09           | 04-15                                                 | 05-26         | >05-31        | >05-31        | >05-31          |
| Rwanda                | 04-22                                                 | 05-07         | 05-19         | >05-31        | >05-31          | >05-31                                                | >05-31        | >05-31        | >05-31        | >05-31          |
| Réunion               | 03-30                                                 | 04-04         | 04-07         | 04-10         | 04-18           | 04-07                                                 | 04-27         | 05-15         | >05-31        | >05-31          |
| Sao Tome and Principe | 04-03                                                 | 04-14         | 04-21         | 04-29         | >05-31          | 04-03                                                 | 04-14         | 04-21         | 04-29         | >05-31          |
| Senegal               | 03-27                                                 | 03-31         | 04-02         | 04-03         | 04-08           | 03-27                                                 | 03-31         | 04-02         | 04-04         | 04-09           |
| Seychelles            | >05-31                                                | >05-31        | >05-31        | >05-31        | >05-31          | >05-31                                                | >05-31        | >05-31        | >05-31        | >05-31          |
| Sierra Leone          | 04-11                                                 | 04-22         | 05-05         | >05-31        | >05-31          | 04-11                                                 | 04-22         | 05-05         | >05-31        | >05-31          |
| Somalia               | 04-16                                                 | 04-28         | 05-13         | >05-31        | >05-31          | 04-16                                                 | 04-28         | 05-13         | >05-31        | >05-31          |
| South Africa          | 03-26                                                 | 03-30         | 04-02         | 04-04         | 04-10           | 03-27                                                 | 04-03         | 04-08         | 04-15         | 05-10           |
| South Sudan           | 05-03                                                 | >05-31        | >05-31        | >05-31        | >05-31          | >05-31                                                | >05-31        | >05-31        | >05-31        | >05-31          |
| Sudan                 | 04-08                                                 | 04-15         | 04-20         | 04-27         | >05-31          | 04-08                                                 | 04-15         | 04-20         | 05-03         | >05-31          |
| Tanzania              | 04-02                                                 | 04-08         | 04-11         | 04-15         | 04-22           | 04-02                                                 | 04-08         | 04-11         | 04-15         | 04-22           |
| Togo                  | 04-05                                                 | 04-14         | 04-20         | 04-27         | >05-31          | 04-05                                                 | 04-14         | 04-20         | 04-27         | >05-31          |
| Tunisia               | 03-24                                                 | 03-27         | 03-29         | 03-31         | 04-04           | 03-26                                                 | 03-31         | 04-05         | 04-11         | 04-28           |
| Uganda                | 04-10                                                 | 04-24         | 05-03         | 05-19         | >05-31          | 04-24                                                 | >05-31        | >05-31        | >05-31        | >05-31          |
| Zambia                | 04-11                                                 | 04-22         | 05-08         | >05-31        | >05-31          | 04-11                                                 | 04-22         | 05-08         | >05-31        | >05-31          |
| Zimbabwe              | 04-17                                                 | 05-06         | 05-24         | >05-31        | >05-31          | >05-31                                                | >05-31        | >05-31        | >05-31        | >05-31          |

Table 2: Summary statistics for the estimated date by which 10,000 infections are reached in each African country. Reproduction numbers used for the simulation were 2.0 before, and 1.5 or 1.0 after stay-at-home order came into force in each country. Simulations were performed until 31<sup>st</sup> May, or 10,000 infections are reached, whichever is earlier, based on 1,000 model runs.

A)

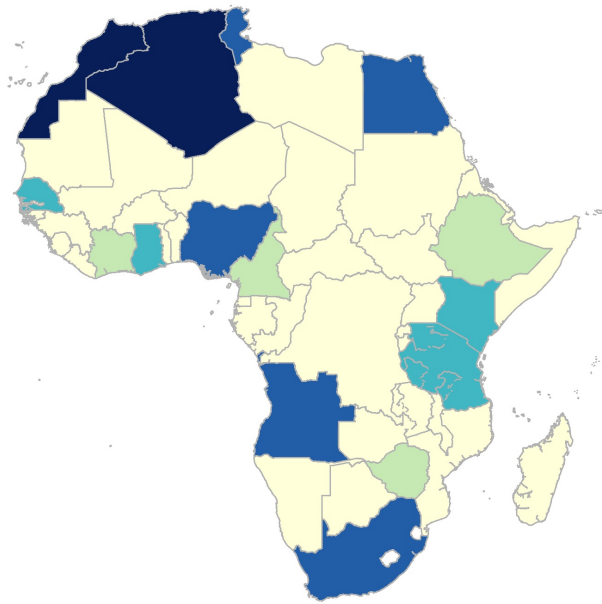

B)

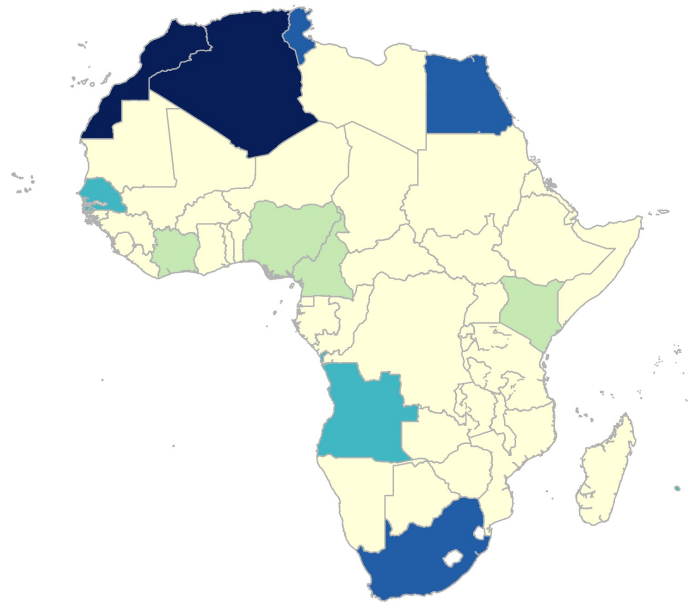

Estimated number of imported cases from new epicentres  
in Europe and America (posterior median)

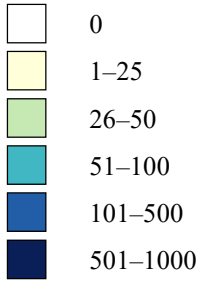

A) By end of March

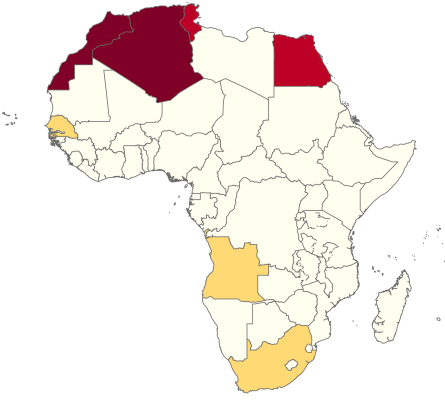

B) By end of April

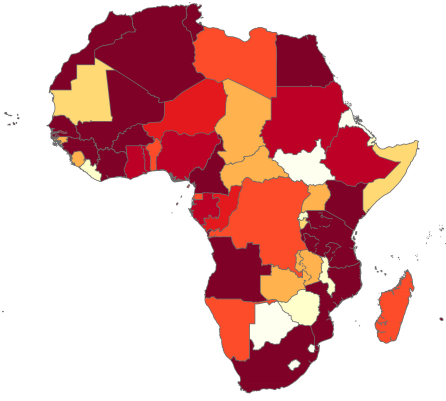

C) By end of May

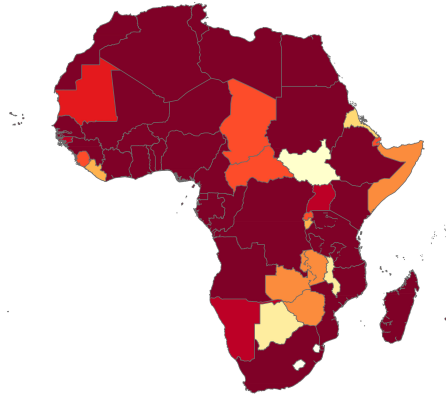

D) By end of March

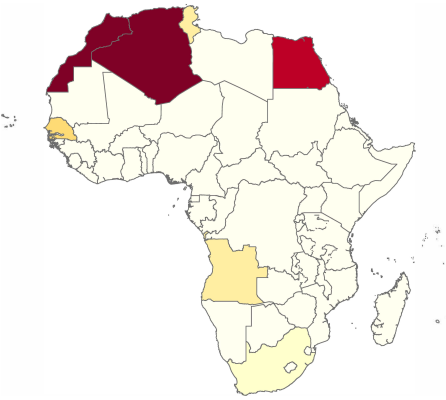

E) By end of April

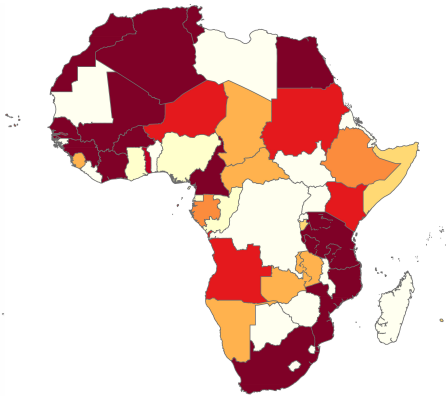

F) By end of May

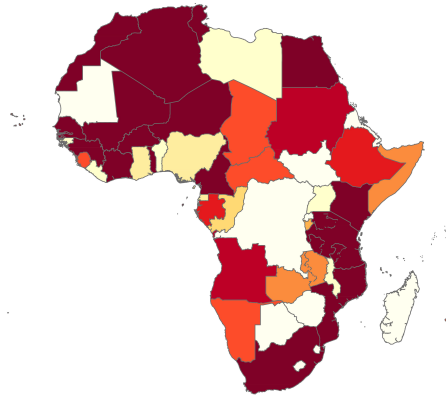

G) By end of March

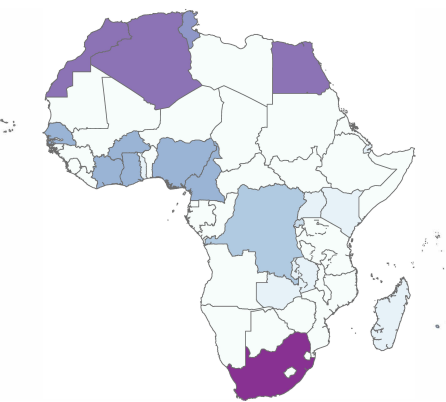

H) By end of April

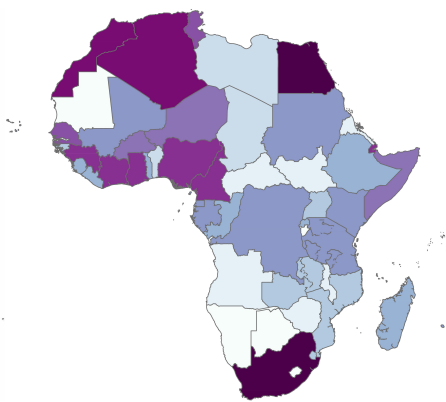

Estimated probability of reaching 10,000 infections

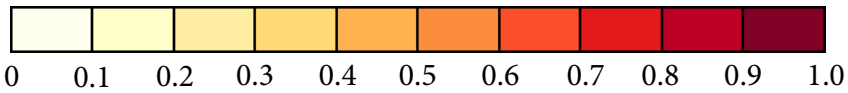

Total number of cases reported

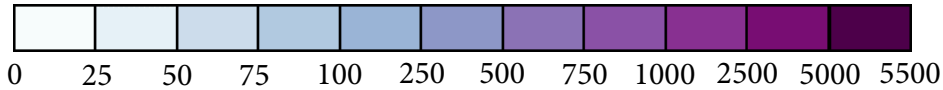

Source: https://medrxiv.org/content/10.1101/2020.05.22.20110304v1.full.pdf
